# Supplementary material for: Pathogenicity and Transmissibility of Clade 2.3.4.4h H5N6 Avian Influenza Viruses in Mammals
Source: MDPI journal article supplement (doi:10.3390/ani12223079), 2022-11-09
Supplement: s1 [file s1]

## Article

# Pathogenicity and Transmissibility of Clade 2.3.4.4h H5N6 Avian Influenza Viruses in Mammals

Cheng Zhang <sup>1,2,†</sup>, Huan Cui <sup>2,3,†</sup>, Chunmao Zhang <sup>2</sup>, Kui Zhao <sup>3</sup>, Yunyi Kong <sup>2</sup>, Ligong Chen <sup>1</sup>, Shishan Dong <sup>1</sup>, Zhaoliang Chen <sup>1</sup>, Jie Pu <sup>2</sup>, Lei Zhang <sup>2</sup>, Zhendong Guo <sup>2,\*</sup> and Juxiang Liu <sup>1,\*</sup>

<sup>1</sup> College of Veterinary Medicine, Hebei Agricultural University, Baoding 071000, China

<sup>2</sup> Changchun Veterinary Research Institute, Chinese Academy of Agriculture Sciences, Changchun 130122, China

<sup>3</sup> College of Animal Medicine, Jilin University, Changchun 130062, China

\* Correspondence: guozd06@163.com (Z.G.); dkljx@hebau.edu.cn (J.L.)

† These authors contributed equally to this work.

**Table S1.** Amino acid differences between two H5N6 influenza viruses.

| Segment | Position | HB1905 | HB1907 |
|---------|----------|--------|--------|
| HA      | 44       | R      | G      |
|         | 77       | S      | R      |
|         | 125      | R      | S      |
|         | 128      | S      | P      |
|         | 145      | A      | P      |
|         | 166      | M      | I      |
|         | 173      | K      | S      |
|         | 187      | S      | N      |
|         | 188      | V      | A      |
|         | 193      | N      | K      |
|         | 218      | A      | T      |
|         | 227      | R      | S      |
|         | 531      | V      | A      |
| NA      | 26       | I      | T      |
|         | 39       | V      | M      |
|         | 43       | T      | A      |
|         | 46       | N      | S      |
|         | 76       | V      | M      |
|         | 81       | E      | G      |
|         | 130      | R      | K      |
|         | 250      | K      | R      |
|         | 262      | M      | I      |
|         | 266      | A      | T      |
|         | 286      | R      | G      |
|         | 342      | I      | T      |
|         | 345      | S      | N      |
|         | 386      | D      | N      |
| PB2     | 80       | R      | K      |
|         | 137      | S      | N      |
|         | 183      | M      | L      |
|         | 225      | I      | V      |
|         | 332      | K      | R      |
|         | 338      | I      | V      |
|         | 340      | R      | K      |
|         | 348      | V      | L      |

|     |   |   |
|-----|---|---|
| 451 | L | I |
| 457 | I | V |
| 461 | V | I |
| 490 | N | S |
| 508 | Q | R |
| 559 | N | T |
| 598 | T | V |
| 613 | A | V |
| 627 | E | K |
| 636 | M | L |
| 648 | L | V |
| 661 | S | A |
| 676 | T | V |
| 680 | N | D |
| 699 | R | K |
| 731 | A | V |

**Table S2.** Nucleotide similarity of HA gene of two H5N6 isolates.

| The Strains in This Study         | Similar Strains                             | Nucleotide Similarity |
|-----------------------------------|---------------------------------------------|-----------------------|
| A/chicken/Hebei/HB1905/2019(H5N6) | A/Jiangsu/1/2018 (H5N6)                     | 99.0%                 |
|                                   | A/JiangsuNanjing/1128/2020 (H5N6)           | 98.6%                 |
| A/chicken/Hebei/HB1905/2019(H5N6) | A/duck/Jiangxi/2.28NCNP25K3-OC/2018 (H5N6)  | 98.8%                 |
|                                   | A/Goose/Guangdong/7.20DGCP010-C/2017 (H5N6) | 99.3%                 |
